# Supplementary material
Source: bioRxiv or medRxiv preprint supplement (https://www.biorxiv.org/content/biorxiv/early/2021/09/30/2021.09.28.462211/DC1/embed/media-1.pdf)
Supplement: Supplementary file [file media-1.pdf]

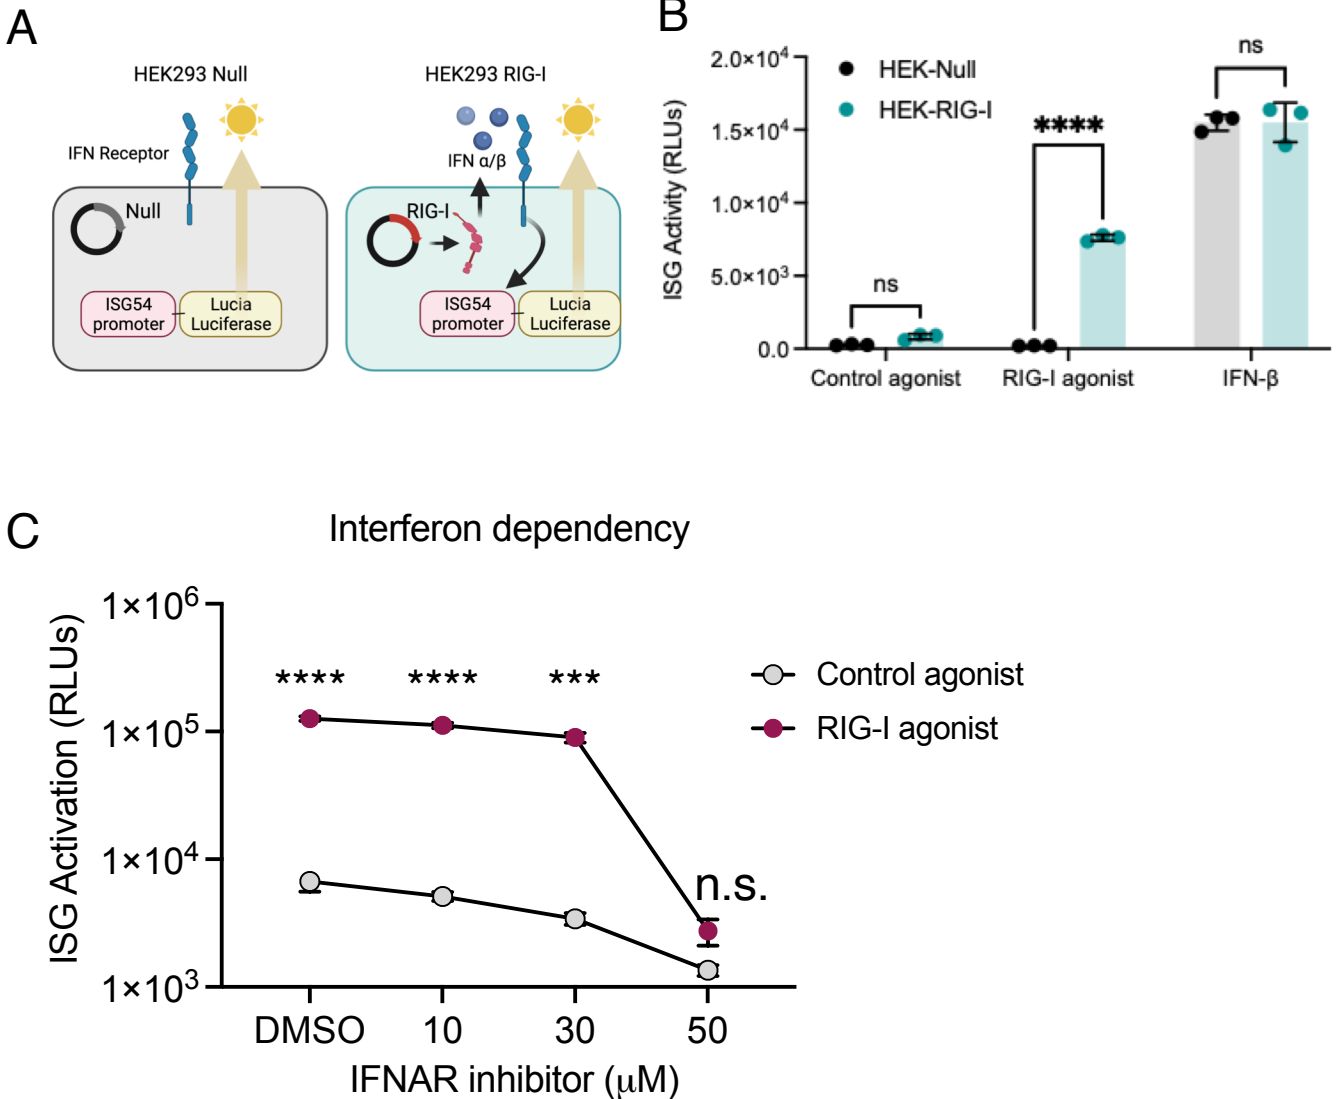

**Supplementary Figure 1. RIG-I and IFN dependent activation of an ISG54 luciferase reporter cell line.** A-B) HEK293 reporter cell lines with an ISG54 responsive luciferase gene and a null vector or RIG-I expressing vector were treated with a control agonist or RIG-I agonist or IFN-β as a positive control. ISG activity was assessed using luminescence at 24h in the null cell line and the RIG-I expressing cell lines. \*\*\*\*P<0.0001 using ANOVA with post-hoc Sidak's test. C) HEK293 RIG-I cells were treated with a control agonist or RIG-I agonist in the presence of indicated concentrations of an interferon alpha receptor antagonist. ISG activity was assessed by luminescence at 24h. \*\*\*\*P<0.0001 using Welch's T-test with post-hoc Bonferroni-Sidak's test.

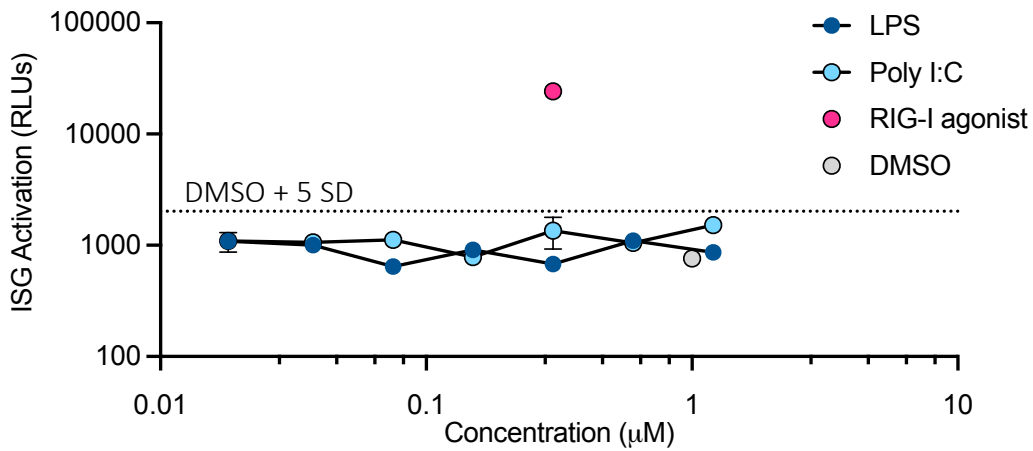

**Supplementary Figure 2. TLR ligands do not activate ISG54 luciferase in our reporter assay.** HEK293 reporter cell lines were treated with different Poly I:C, TLR 3 agonist or LPS a TLR4 and TLR2 agonist at the indicated concentrations. RIG-I agonist was used at 0.3 ug/ml as a positive control and 1% DMSO as negative control. Dotted line indicates our hit criteria at 5 SD above the mean of negative control wells.

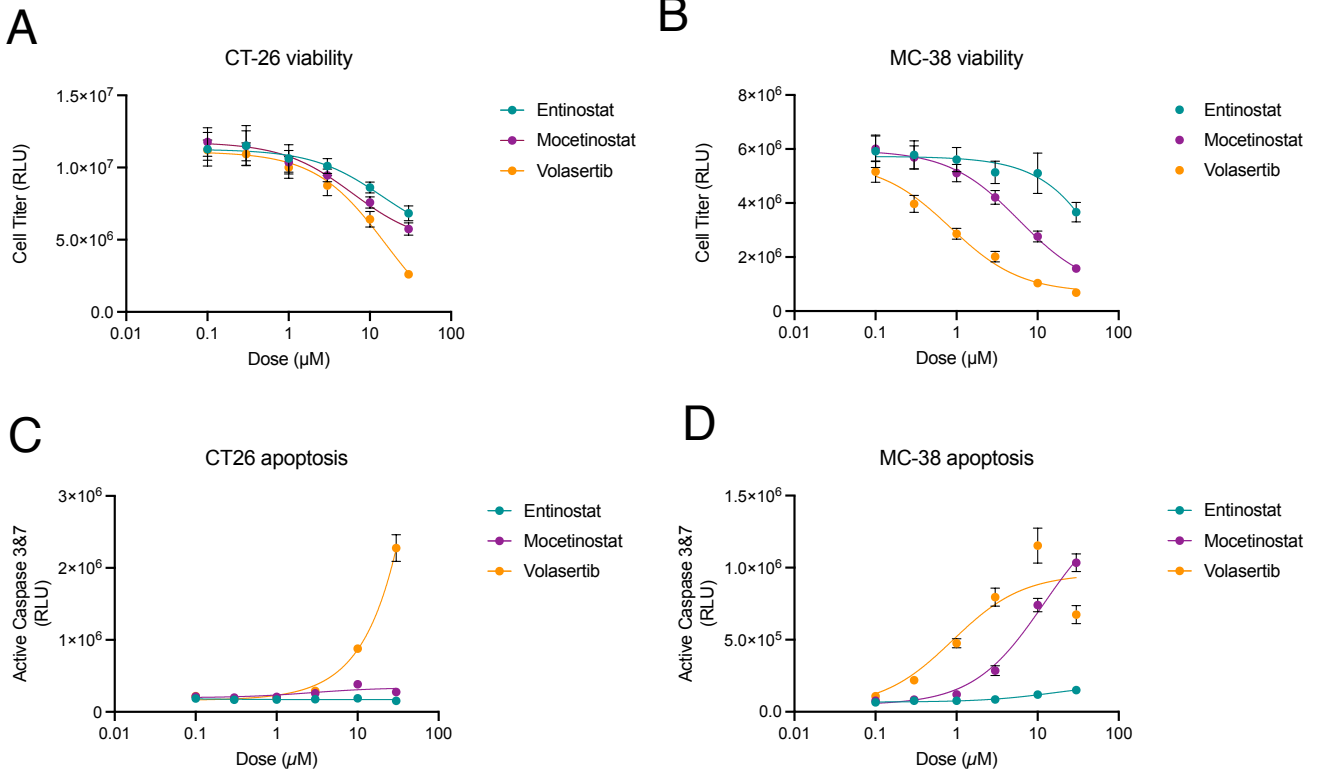

**Supplementary Figure 3. Viability of tumor cell lines in response to HDAC and PLK inhibitors.** CT26 or MC38 Colorectal carcinoma cells were treated with the indicated concentrations of the HDAC inhibitors or Plk1 inhibitor. 24h later A-B) viability was measured using a Cell Titer glo assay C-D) cell death was measured by a CaspaseGlo assay.

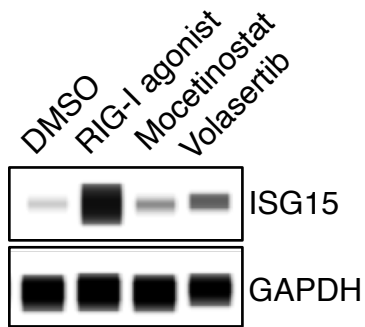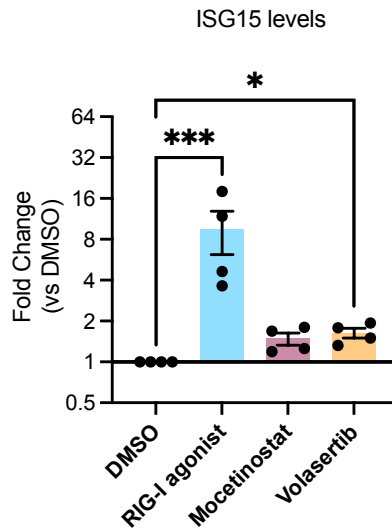

**Supplementary Figure 4. Activation of RIG-I signaling in response to HDAC and PLK inhibitors.** A) MC38 Colorectal carcinoma cells were treated with RIG-I agonist (0.5 ug/ml), Mocetinostat (5uM) or Volasertib (1uM). Simple Wes western blot for ISG15 or GAPDH is shown. Right panel depicts quantitation from 4 independent biological replicates. \*  $P < 0.05$ , \*\*\*  $P < 0.005$  by Kruskal-Wallis test
